# Supplementary material for: Adaptation of the personal social capital brief scale for the measurement of the offline and online social capital in Italy
Source: PLOS journal article supplement (doi:10.1371/journal.pone.0272454), 2022-09-01
Supplement: S1 (10.1371/journal.pone.0272454.s001) [file journal.pone.0272454.s001.pdf]

## Supporting Information

### Content Investigated in the Personal On-Offline Social Capital Brief Scale

The individual is asked to read each question and check the box that best represents their answer on a 5-point Likert scale (A few/None-A lot/All).

|                                                                                                                                                                                                                                                                                                                                                                                                                                                                                                                                                                                                                                                                                                                                           |
|-------------------------------------------------------------------------------------------------------------------------------------------------------------------------------------------------------------------------------------------------------------------------------------------------------------------------------------------------------------------------------------------------------------------------------------------------------------------------------------------------------------------------------------------------------------------------------------------------------------------------------------------------------------------------------------------------------------------------------------------|
| <b>1. Number of people in the individual's social network for each of the following three categories</b>                                                                                                                                                                                                                                                                                                                                                                                                                                                                                                                                                                                                                                  |
| 1). Friends<br>2). Work colleagues/fellow students<br>3). Online contacts (i.e., persons met and with whom interact only online)                                                                                                                                                                                                                                                                                                                                                                                                                                                                                                                                                                                                          |
| <b>2. Number of people in each of the following three categories who the individual can trust</b>                                                                                                                                                                                                                                                                                                                                                                                                                                                                                                                                                                                                                                         |
| 1). Friends<br>2). Work colleagues/fellow students<br>3). Online contacts (i.e., persons met and with whom interact only online)                                                                                                                                                                                                                                                                                                                                                                                                                                                                                                                                                                                                          |
| <b>3. Number of people in each of the following three categories who will definitely support the individual upon their request</b>                                                                                                                                                                                                                                                                                                                                                                                                                                                                                                                                                                                                        |
| 1). Friends<br>2). People in the neighborhood<br>3). Online contacts (i.e., persons met and with whom interact only online)                                                                                                                                                                                                                                                                                                                                                                                                                                                                                                                                                                                                               |
| <b>4. Number of people in all the following categories – individual's friends, work colleagues/fellow students, people in the neighborhood, online contacts, and family members, relatives, fellow citizens or childhood friends/old classmates – who possess the following assets/resources</b>                                                                                                                                                                                                                                                                                                                                                                                                                                          |
| 1). Broad connections with others<br>2). High reputation/influence                                                                                                                                                                                                                                                                                                                                                                                                                                                                                                                                                                                                                                                                        |
| <b>5. Number of the following two types of associations/groups in the individual's community</b>                                                                                                                                                                                                                                                                                                                                                                                                                                                                                                                                                                                                                                          |
| 1). Community service associations/groups (for example: groups, including youth organizations offering caregiving, assistance, shelter, soup kitchen, nursing home, environmental protection, trade union representation, cooperative associations, men's groups, women's groups, community committee/groups, local tourism promotion groups, student organizations)<br>2). Cultural associations/groups including those having only online activities (for example: theatre or dance groups, music bands, choirs or orchestras, arts and crafts groups, traditional folk groups, promotional associations for cultural events, senior citizens' study programs, youth-oriented cultural associations, Facebook/online discussion groups) |
| <b>6. Number of each of the two types of associations/groups in the individual's community that represent their rights and interests</b>                                                                                                                                                                                                                                                                                                                                                                                                                                                                                                                                                                                                  |

- 1). Community service associations/groups (for example: groups, including youth organizations offering caregiving, assistance, shelter, soup kitchen, nursing home, environmental protection, trade union representation, cooperative associations, men's groups, women's groups, community committee/groups, local tourism promotion groups, student organizations)
- 2). Cultural associations/groups including having only online activities (for example: theatre or dance groups, music bands, choirs or orchestras, arts and crafts groups, traditional folk groups, promotional associations for cultural events, senior citizens' study programs, youth-oriented cultural associations, Facebook/online discussion groups)

**7. Number of each of the two types of associations/groups in the individual's community that will support them upon their request?**

- 1). Community service associations/groups (for example: groups, including youth organizations offering caregiving, assistance, shelter, soup kitchen, nursing home, environmental protection, trade union representation, cooperative associations, men's groups, women's groups, community committee/groups, local tourism promotion groups, student organizations)
- 2). Religious or political associations/groups

**8. Number of associations/groups in the individual's community of the following categories– community service, cultural, religious, political, recreational, leisure, and economic and professional associations/groups (e.g., Chamber of Commerce) – that possess the following assets/resources**

- 1). Broad social connections
- 2). Extensive social influence
